# Supplementary material
Source: PubMed Central journal article supplement (PMC3012987)
Supplement: supp_M110.150433_jbc.M110.150433-1.pdf [file supp_M110.150433_jbc.M110.150433-1.pdf]

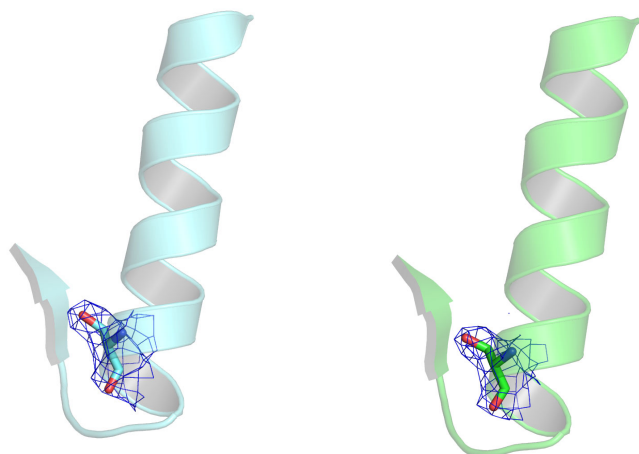

**a. Electron density of S370, shown as sticks.**

Contours of 2Fo-Fc map are shown as blue mesh at 1.2  $\sigma$ .

Blue: pH 7.1, Green: pH 5.4,

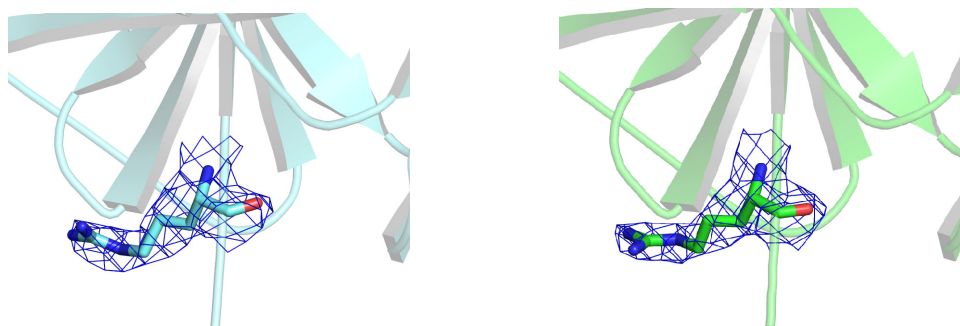

**b. Electron density of R495, shown as sticks.**

Contours of 2Fo-Fc map are shown as blue mesh at 1.2  $\sigma$ .

Blue: pH 7.1 Green: pH 5.4,

Supplementary Figure
